1 **Title:** SARS-CoV-2 20I/501Y.V1 variant in the hamster model

2 **Author list:** Maxime Cochin\*<sup>1</sup>, Léa Luciani\*<sup>1</sup>, Franck Touret<sup>1</sup>, Jean-Sélim Driouich<sup>1</sup>, Paul-  
3 Rémi Petit<sup>1</sup>, Grégory Moureau<sup>1</sup>, Cécile Baronti<sup>1</sup>, Laurence Thirion<sup>1</sup>, Piet Maes<sup>2</sup>, Robbert  
4 Boudewijns<sup>3</sup>, Johan Neyts<sup>3</sup>, Xavier de Lamballerie<sup>1</sup>, Antoine Nougairède<sup>1</sup>

5 **Affiliations:**

6 <sup>1</sup> Unité des Virus Émergents (UVE: Aix-Marseille Univ-IRD 190-Inserm 1207-IHU  
7 Méditerranée Infection), Marseille, France

8 <sup>2</sup> KU Leuven Department of Microbiology, Immunology and Transplantation, Laboratory of  
9 Clinical and Epidemiological Virology, Rega Institute, Leuven, Belgium

10 <sup>3</sup> KU Leuven Department of Microbiology, Immunology and Transplantation, Laboratory of  
11 Virology and Chemotherapy, Rega Institute, Leuven, Belgium

12 \* These authors contributed equally to this article.

13 **Corresponding author:** Antoine Nougairède ([antoine.nougairède@univ-amu.fr](mailto:antoine.nougairède@univ-amu.fr))

14 **Characters count:** 12 641

15 **Abstract**

16 Late 2020, SARS-CoV-2 20I/501Y.V1 variant from lineage B.1.1.7 emerged in United  
17 Kingdom and gradually replaced the D614G strains initially involved in the global spread of  
18 the pandemic. In this study, we used a Syrian hamster model to compare a clinical strain of  
19 20I/501Y.V1 variant with an ancestral D614G strain. The 20I/501Y.V1 variant succeeded to  
20 infect animals and to induce a pathology that mimics COVID-19. However, both strains  
21 induced replicated to almost the same level and induced a comparable disease and immune  
22 response. A slight fitness advantage was noted for the D614G strain during competition and  
23 transmission experiments. These data do not corroborate the current epidemiological situation  
24 observed in humans nor recent reports that showed a more rapid replication of the  
25 20I/501Y.V1 variant in human reconstituted bronchial epithelium.

26 **Text**

27 The genetic evolution of the severe acute respiratory syndrome coronavirus 2 (SARS-CoV-2)  
28 virus is a constant concern for medical and scientific communities. From January 2020,  
29 viruses carrying the spike D614G mutation emerged in several countries (Korber et al., 2020;  
30 Volz et al., 2021; Yurkovetskiy et al., 2020). In June, D614G SARS-CoV-2 lineage B.1  
31 became the dominant form of circulating virus worldwide and replaced the initial SARS-  
32 CoV-2 strains related to the outbreak in Wuhan, China. Experimental data from human lung  
33 epithelium and animal models revealed that the D614G substitution increased virus infectivity  
34 and transmissibility as compared to an original D614 strain (Plante et al., 2020). However, it  
35 seems that this D614G variant does not cause more severe clinical disease. In late 2020, three  
36 SARS-CoV-2 variants sharing the N501Y spike mutation located in the receptor binding  
37 motif (RBM) emerged almost simultaneously in the United Kingdom (20I/501Y.V1 variant  
38 from lineage B.1.1.7 ; initially named VOC 202012/01) (du Plessis et al., 2021), in South

39 Africa (501Y.V2 variant from lineage B.1.351) (CDC) and in Brazil (P.1 variant from lineage  
40 B.1.1.28.1) (Sabino et al., 2021). As previously observed with the D614G variant, the  
41 20I/501Y.V1 variant spread rapidly and became dominant in United Kingdom in December  
42 2020, and in many other European and non-European countries from February 2021 onwards  
43 (CoVariants.org). This similar evolution pattern seems to be associated with an improved  
44 affinity of the viral spike protein for the human angiotensin-converting enzyme 2 (ACE2)  
45 receptor (Liu et al., 2021; Zahradník et al., 2021). The 20I/501Y.V1 variant harbors 8  
46 additional spike mutations, including substitutions and deletions, compared to D614G  
47 circulating strains. At this stage, there are few data regarding the 20I/501Y.V1 variant  
48 pathogenicity and its ability to spread more easily (Davies et al., 2021; Zhao et al., 2021).  
49 Recent studies also revealed that the active circulation of the 20I/501Y.V1 variant may not  
50 impact the risk of reinfection, the efficiency of vaccine campaigns and antibody therapies  
51 remains also unknown (Chen et al., 2021; Planas et al., 2021; Shen et al., 2021). We recently  
52 described the fitness advantage of 20I/501Y.V1 variant using a model of reconstituted  
53 bronchial human epithelium (Touret et al., 2021). In the present work, we compared the  
54 phenotype of the 20I/501Y.V1 variant (hCoV-103 19/Belgium/rega-12211513/2020 strain)  
55 with that of a D614G strain (Germany/BavPat1/2020 strain) in the Syrian hamster  
56 (*Mesocricetus auratus*) model. The study includes comparison of viral replication kinetics,  
57 transmissibility, clinical course of the disease and immunological response.

58 First, to detect modifications of the clinical course of the disease following infection with the  
59 20I/501Y.V1 variant, groups of 12 three-week-old female Syrian hamsters were intranasally  
60 infected with 50µl containing  $2 \times 10^3$  TCID<sub>50</sub> of 20I/501Y.V1 or BavPat D614G strain (Figure  
61 1.a). Follow-up of these animals until 7 days post-infection (dpi) showed with both strains a  
62 lack of weight gain compared to mock-infected group. Normalized weights (i.e. % of initial  
63 weights) of animals infected with 20I/501Y.V1 variant were significantly higher than those of

64 BavPat D614G group at 3, 4 and 5 dpi (p values between 0.0403 and 0.0007)(Figure 1.b).  
65 However, this difference seems to be the result of a delayed onset of disease for 20I/501Y.V1  
66 variant since significant difference of normalized weights compared to mock-infected group  
67 began at 2 dpi for animals infected with BavPat D614G strain and at 3 dpi for those infected  
68 with the 20I/501Y.V1 variant.

69 Second, to further investigate viral replication, groups of 12 three-week-old female Syrian  
70 hamsters were intranasally infected with 50 $\mu$ l containing  $2 \times 10^3$ TCID<sub>50</sub> of each viral strain and  
71 several tissues were collected at different time points (Figure 1.a).

72 Viral RNA quantification was performed using a RT-qPCR assay (i) in lung and nasal wash  
73 samples collected at 2, 4 and 7 dpi, and (ii) in blood and gut samples collected at 2 and 4 dpi.  
74 Infectious titers were determined using a TCID<sub>50</sub> assay in lungs and nasal washes at 2 and 4  
75 dpi. Overall, the results indicated that the 20I/501Y.V1 variant properly replicate in the  
76 hamster gut and respiratory tract. However, higher viral RNA yields were found in all  
77 samples from animals infected with BavPat D614G strain (difference ranged from 0.085 to  
78 0.801 log<sub>10</sub>). This difference was significant in lung and gut at any time point (p values  
79 ranging between 0.0332 and 0.0084) (Figure 1.c.d.e). Results of plasma did not show any  
80 significant difference (Supplemental Figure 1.a). A similar pattern was observed when  
81 assessing infectious viral loads using a TCID<sub>50</sub> assay (differences ranged from 0.0343 to  
82 0.389 log<sub>10</sub>) but no significant difference was found (Figure 1.f.g).

83 To detect more subtle differences of viral replication *in vivo*, we performed competitions  
84 experiments as previously described (Fabritus et al., 2015; Liu et al., 2021). Groups of 12  
85 animals were simultaneously infected intranasally with 50 $\mu$ l containing 50% ( $10^3$  TCID<sub>50</sub>) of  
86 each viral strain. Lungs, nasal washes and plasma were collected at 2 and 4 dpi (Figure 1.a).  
87 Using two specific RT-qPCR systems, we estimated in all samples the proportion of each

88 viral genome in the viral population (expressed as BavPat D614G/20I/501Y.V1 ratios in  
89 Figure 1.h.i). Once again, results revealed that BavPat D614G strain seems to replicate a  
90 somewhat more efficiently and supplants progressively the 20I/501Y.V1 variant. Indeed,  
91 BavPat D614G/ 20I/501Y.V1 estimated ratios at 4dpi were significantly higher than those at 2  
92 dpi in nasal washes ( $p=0.0001$ ). Moreover, ratios at 4 dpi in nasal washes were also  
93 significantly higher than those in the infecting inoculum ( $p=0.022$ ) (Figure 1.i). By contrast,  
94 no significant difference was found in lungs (Figure 1.h) and plasma (supplemental Figure  
95 1.b).

96 To obtain a clearer picture, we compared the transmissibility of both strains in a last *in vivo*  
97 experiment. To increase the sensitivity of the procedure, groups of 12 animals were  
98 simultaneously infected intranasally with 50 $\mu$ l containing a low dose of each viral strain (20  
99 TCID<sub>50</sub>). These animals, called ‘donors’, firstly housed individually, were co-housed at 2 dpi  
100 with an uninfected animal, called ‘contact’, during a period of 6 hours in a new cage. Then,  
101 donors returned in their initial cages and were sacrificed at 3 dpi. Contact animals were  
102 sacrificed at 3 days post-contact (Figure 2.a). Using the two specific RT-qPCR systems used  
103 for competition experiments, we estimated in all samples (nasal washes and lungs) the  
104 proportion of each viral genome in the viral population (Figure 2.b). Data from lungs of  
105 donors showed for two animals, an equivalent proportion of both viruses (from 40% to 60%  
106 of each strain); for five animal, a majority (>60%) of BavPat D614G virus; and for the five  
107 remaining animals, a majority (>60%) of 20I/501Y.V1 virus. However, we did not find the  
108 same distribution in nasal washes in which we observed: for eight animals, an equivalent  
109 proportion of both viruses; for four animal, a majority of BavPat D614G virus; and for no  
110 animal, a majority of 20I/501Y.V1 virus. Consistently with this observation, we found a large  
111 majority (>75%) of BavPat D614G virus in lungs and nasal washes of eight contacts, and only  
112 two and one animals exhibited a large majority (>75%) of 20I/501Y.V1 virus in lungs and

113 nasal washes respectively (Figure 2.b). When analyzing the data from each pair of animals,  
114 we observed an increase of the proportion of Bavpat D614G virus between the nasal wash of  
115 the donor and lungs of the contact in almost all cases (10/12).

116 Altogether, our results suggest that the replication of both strains was highly comparable in  
117 hamsters. Nonetheless, using a more sensitive method, we observed that the 20I/501Y.V1  
118 variant is outcompeted by the BavPat D614G strain; it results in an advantage for the BavPat  
119 D614G strain during transmission experiments. Notably, such results are not in line with  
120 experimental data *ex vivo* (human epithelial cultures grown at the air liquid interface) and  
121 with epidemiological observations.

122 We then compared transcriptional early immune signatures in lungs from animals sacrificed at  
123 4 dpi following intranasal infection with 50 $\mu$ l containing  $2 \times 10^3$ TCID<sub>50</sub> of 20I/501Y.V1 or  
124 BavPat D614G strain. The expression level of seven cytokines (Interferon- $\gamma$ , TNF- $\alpha$ , IL-6, IL-  
125 10, IL-1 $\beta$ , Cxcl-10, Ccl5) was quantified using RT-qPCR assays (Supplemental Figure 2;  
126 expressed as mRNA copies/ $\gamma$ -actin copies). Infection by both viral strains induced an  
127 important increase of CXCL10, CCL5, IFN $\gamma$ , IL-6 and IL-10 expression levels ( $p < 0.0001$ ) and  
128 a moderate increase of IL-1 $\beta$  ( $p = 0.0014$  for BavPat D614G and  $p = 0.0281$  for 20I/501Y.V1)  
129 and TNF $\alpha$  ( $p = 0.0389$  for BavPat D614G and  $p = 0.0350$  for 20I/501Y.V1) expressions levels  
130 to mock-infected animals (Supplemental Figure 2). Comparison between animals infected  
131 with 20I/501Y.V1 and BavPat D614G strains did not show any significant differences of  
132 cytokines expression levels. This suggests that the early immune response induced by both  
133 viral strains is similar, in line with a recent study that did not present major differences  
134 except an upregulation of IL-6, IL-10 and IFN $\gamma$  with animals infected by 20I/501Y.V1 variant  
135 (Abdelnabi et al., 2021).

136 Finally, we used sera collected at 7 dpi following intranasal infection with 50 $\mu$ l containing  
137  $2 \times 10^3$  TCID<sub>50</sub> of 20I/501Y.V1 (n=4) or BavPat D614G (n=4) (Figure 1.a) strain to assess the  
138 level of protection against three circulating strains of SARS-CoV-2: the BavPat D614G strain,  
139 the 20I/501Y.V1 variant and a ‘South-African’ 20H/501Y.V2 (lineage B 1.351) variant. Sera  
140 were tested for the presence of antibodies using a 90-99% viral RNA Yield Reduction  
141 Neutralization Test (YRNT90/YRNT99) (Figure 1.j.k). Overall, results showed that animals  
142 infected with 20I/501Y.V1 or BavPat D614G strains produced similar levels of neutralization  
143 antibodies against these strains. However, all infected animals produced lower neutralization  
144 titers against the 20H/501Y.V2 variant. This difference is significant with all animals when  
145 considering YRNT90 titers (p values between 0.001 and 0.045), and significant only with  
146 animals infected with 20I/501Y.V1 variant when considering YRNT99 titers (p < 0.048)  
147 (Supplemental Table 1). This suggests an effective cross-immunity between 20I/501Y.V1 and  
148 BavPat D614G, but a reduced cross-protection against the 20H/501Y.V2 variant. These data  
149 indicate that only an active circulation of 20H/501Y.V2 variant might increase the risk of  
150 reinfection or failure of vaccination campaigns. This is in accordance with recently reported  
151 epidemiological observation (Graham et al., 2021; Jangra et al., 2021; Nonaka et al., 2021a,  
152 2021b; Zucman et al., 2021).

153 In conclusion, our results show that the 20I/501Y.V1 variant induces a pathology that mimics  
154 human SARS-CoV-2 infection in the hamster model and can be used for preclinical analysis  
155 of vaccines and therapeutic agents. These data corroborate those of a recent study in which  
156 the same strains, a similar hamster model but higher virus inocula ( $10^5$  TCID<sub>50</sub>) were used  
157 (Abdelnabi et al., 2021). Since its emergence in late 2020 in Europe, the 20I/501Y.V1 variant  
158 spread across several continents and became the majority circulating strain in many countries.  
159 Moreover, data from reconstituted human airway epithelia also showed a strong replicative  
160 fitness advantage for 20I/501Y.V1 variant (Touret et al., 2021). Notably, our findings in the

161 hamster model are not in line with these observations. Altogether, this suggests that the  
162 hamster model may possibly not be the best model to detect weak fitness or transmissibility  
163 differences between clinical strains of SARS-CoV-2. Other animal models such as the ferret  
164 (*Mustela putorius furo*) model that is already employed to study the pathogenicity and  
165 transmissibility of other human respiratory viruses, could be valuable tools in that case.  
166 Nevertheless, in a recent study that used engineered rescued viruses derived from the  
167 USA\_WA1/2020 strain, the hamster model appeared useful to detect weak fitness advantages  
168 and an increases in transmissibility of viruses that carry the N501Y and A570D spike  
169 mutations. However, the role of other mutations located in other parts of the genome of the  
170 20I/501Y.V1 variant [more than twenty when compared to strains isolated in January-  
171 February 2020], was obviously not taken into account using this reverse genetics-based  
172 approach.



## 173 **Acknowledgments**

174 This work was supported by the European Union's Horizon 2020 Research and Innovation  
175 Programme under grant agreements no. 653316 (European Virus Archive goes global project:  
176 <http://www.european-virus-archive.com/>). We also thank Noémie Courtin for her technical  
177 support.

## 178 **Declaration of conflicting interests**

179 Authors declare that there is no conflict of interest

## 180 **References**

- 181 Abdelnabi, R., Boudewijns, R., Foo, C.S., Seldeslachts, L., Sanchez-Felipe, L., Zhang, X.,  
182 Delang, L., Maes, P., Kaptein, S.J.F., Weynand, B., et al. (2021). Comparative infectivity and  
183 pathogenesis of emerging SARS-CoV-2 variants in Syrian hamsters. *BioRxiv*  
184 2021.02.26.433062.
- 185 Chen, R.E., Zhang, X., Case, J.B., Winkler, E.S., Liu, Y., VanBlargan, L.A., Liu, J., Errico,  
186 J.M., Xie, X., Suryadevara, N., et al. (2021). Resistance of SARS-CoV-2 variants to  
187 neutralization by monoclonal and serum-derived polyclonal antibodies. *Nat. Med.* 1–10.
- 188 CDC: <https://stacks.cdc.gov/view/cdc/100655>
- 189 CoVariants: <https://covariants.org/per-country>
- 190 Davies, N.G., Jarvis, C.I., Edmunds, W.J., Jewell, N.P., Diaz-Ordaz, K., and Keogh, R.H.  
191 (2021). Increased mortality in community-tested cases of SARS-CoV-2 lineage B.1.1.7.  
192 *Nature* 1–5.
- 193 Fabritus, L. de, Nougairède, A., Aubry, F., Gould, E.A., and Lamballerie, X. de (2015).  
194 Attenuation of Tick-Borne Encephalitis Virus Using Large-Scale Random Codon Re-  
195 encoding. *PLOS Pathog.* *11*, e1004738.
- 196 Graham, M.S., Sudre, C.H., May, A., Antonelli, M., Murray, B., Varsavsky, T., Kläser, K.,  
197 Canas, L.S., Molteni, E., Modat, M., et al. (2021). The effect of SARS-CoV-2 variant B.1.1.7  
198 on symptomatology, re-infection and transmissibility. *MedRxiv* 2021.01.28.21250680.
- 199 Jangra, S., Ye, C., Rathnasinghe, R., Stadlbauer, D., Group, P. study, Krammer, F., Simon,  
200 V., Martinez-Sobrido, L., García-Sastre, A., and Schotsaert, M. (2021). The E484K mutation  
201 in the SARS-CoV-2 spike protein reduces but does not abolish neutralizing activity of human  
202 convalescent and post-vaccination sera. *MedRxiv* 2021.01.26.21250543.
- 203 Korber, B., Fischer, W.M., Gnanakaran, S., Yoon, H., Theiler, J., Abfalterer, W., Hengartner,  
204 N., Giorgi, E.E., Bhattacharya, T., Foley, B., et al. (2020). Tracking Changes in SARS-CoV-2

- 205 Spike: Evidence that D614G Increases Infectivity of the COVID-19 Virus. *Cell* 182, 812-  
206 827.e19.
- 207 Liu, Y., Liu, J., Plante, K.S., Plante, J.A., Xie, X., Zhang, X., Ku, Z., An, Z., Scharton, D.,  
208 Schindewolf, C., et al. (2021). The N501Y spike substitution enhances SARS-CoV-2  
209 transmission. *BioRxiv* 2021.03.08.434499.
- 210 Nonaka, C.K.V., Franco, M.M., Gräf, T., Mendes, A.V.A., Aguiar, R.S. de, Giovanetti, M.,  
211 and Souza, B.S. de F. (2021a). Genomic Evidence of a SARS-CoV-2 Reinfection Case with  
212 E484K Spike Mutation in Brazil.
- 213 Nonaka, C.K.V., Franco, M.M., Gräf, T., de Lorenzo Barcia, C.A., de Ávila Mendonça, R.N.,  
214 de Sousa, K.A.F., Neiva, L.M.C., Fosenca, V., Mendes, A.V.A., de Aguiar, R.S., et al.  
215 (2021b). Genomic Evidence of SARS-CoV-2 Reinfection Involving E484K Spike Mutation,  
216 Brazil. *Emerg. Infect. Dis.* 27.
- 217 Planas, D., Bruel, T., Grzelak, L., Guivel-Benhassine, F., Staropoli, I., Porrot, F., Planchais,  
218 C., Buchrieser, J., Rajah, M.M., Bishop, E., et al. (2021). Sensitivity of infectious SARS-  
219 CoV-2 B.1.1.7 and B.1.351 variants to neutralizing antibodies. *Nat. Med.* 1–8.
- 220 Plante, J.A., Liu, Y., Liu, J., Xia, H., Johnson, B.A., Lokugamage, K.G., Zhang, X., Muruato,  
221 A.E., Zou, J., Fontes-Garfias, C.R., et al. (2020). Spike mutation D614G alters SARS-CoV-2  
222 fitness. *Nature* 1–6.
- 223 du Plessis, L., McCrone, J.T., Zarebski, A.E., Hill, V., Ruis, C., Gutierrez, B., Raghwani, J.,  
224 Ashworth, J., Colquhoun, R., Connor, T.R., et al. (2021). Establishment and lineage dynamics  
225 of the SARS-CoV-2 epidemic in the UK. *Science* 371, 708–712.
- 226 Sabino, E.C., Buss, L.F., Carvalho, M.P.S., Prete, C.A., Crispim, M.A.E., Fraiji, N.A.,  
227 Pereira, R.H.M., Parag, K.V., da Silva Peixoto, P., Kraemer, M.U.G., et al. (2021).  
228 Resurgence of COVID-19 in Manaus, Brazil, despite high seroprevalence. *Lancet Lond. Engl.*  
229 397, 452–455.
- 230 Shen, X., Tang, H., McDanal, C., Wagh, K., Fischer, W., Theiler, J., Yoon, H., Li, D.,  
231 Haynes, B.F., Sanders, K.O., et al. (2021). SARS-CoV-2 variant B.1.1.7 is susceptible to  
232 neutralizing antibodies elicited by ancestral Spike vaccines. *Cell Host Microbe* 0.
- 233 Touret, F., Luciani, L., Baronti, C., Cochin, M., Driouich, J.-S., Gilles, M., Thirion, L.,  
234 Nougairede, A., and Lamballerie, X. de (2021). Replicative fitness SARS-CoV-2  
235 20I/501Y.V1 variant in a human reconstituted bronchial epithelium. *BioRxiv*  
236 2021.03.22.436427.
- 237 Volz, E., Hill, V., McCrone, J.T., Price, A., Jorgensen, D., O’Toole, Á., Southgate, J.,  
238 Johnson, R., Jackson, B., Nascimento, F.F., et al. (2021). Evaluating the Effects of SARS-  
239 CoV-2 Spike Mutation D614G on Transmissibility and Pathogenicity. *Cell* 184, 64-75.e11.
- 240 Yurkovetskiy, L., Wang, X., Pascal, K.E., Tomkins-Tinch, C., Nyalile, T.P., Wang, Y., Baum,  
241 A., Diehl, W.E., Dauphin, A., Carbone, C., et al. (2020). Structural and Functional Analysis  
242 of the D614G SARS-CoV-2 Spike Protein Variant. *Cell* 183, 739-751.e8.

- 243 Zahradník, J., Marciano, S., Shemesh, M., Zoler, E., Chiaravalli, J., Meyer, B., Rudich, Y.,  
244 Dym, O., Elad, N., and Schreiber, G. (2021). SARS-CoV-2 RBD *in vitro* evolution follows  
245 contagious mutation spread, yet generates an able infection inhibitor (Biochemistry).
- 246 Zhao, S., Lou, J., Cao, L., Zheng, H., Chong, M.K.C., Chen, Z., Chan, R.W.Y., Zee, B.C.Y.,  
247 Chan, P.K.S., and Wang, M.H. (2021). Quantifying the transmission advantage associated  
248 with N501Y substitution of SARS-CoV-2 in the UK: an early data-driven analysis. *J. Travel*  
249 *Med.* 28.
- 250 Zucman, N., Uhel, F., Descamps, D., Roux, D., and Ricard, J.-D. (2021). Severe reinfection  
251 with South African SARS-CoV-2 variant 501Y.V2: A case report. *Clin. Infect. Dis. Off. Publ.*  
252 *Infect. Dis. Soc. Am.*
- 253
- 254

## 255 **Figures and Legends**

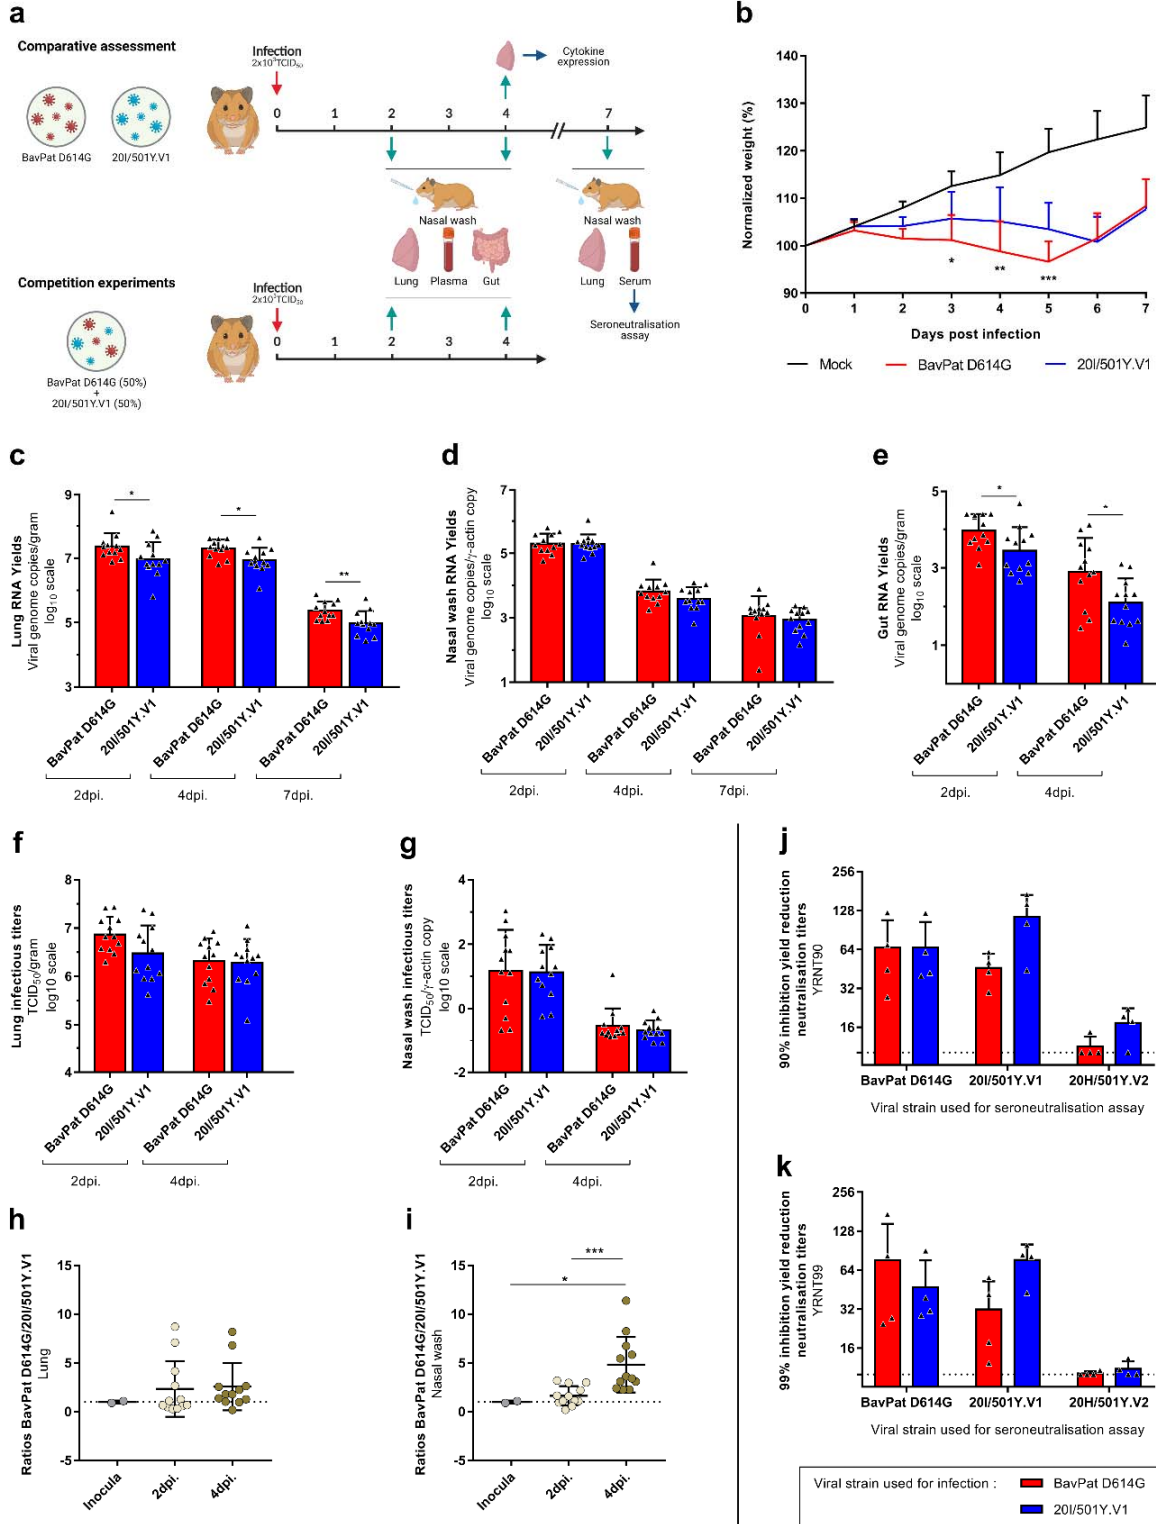

257 **Figure 1: Clinical follow-up, viral replication in Syrian hamsters and seroneutralization tests.** (a)  
258 Experimental timeline. Groups of 12 hamsters were intranasally infected with  $2 \times 10^3$  TCID<sub>50</sub> of  
259 20I/501Y.V1 or BavPat D614G strain for comparative assessment, or with a mix (1:1) of both viral  
260 strains for competition experiment ( $10^3$  TCID<sub>50</sub> of each). (b) Comparative clinical follow-up. Weights  
261 are expressed as normalized weights (i.e. % of initial weight). \*\*\*, \*\* and \* symbols indicate that  
262 normalized weights for the 20I/501Y.V1 group are significantly higher than those of the BavPat  
263 D614G group with a p-value ranging between 0.0001-0.001, 0.001-0.01, and 0.01-0.05, respectively  
264 (Two-way ANOVA test with Tukey's post-hoc analysis). (c-e) Comparative assessment of viral RNA  
265 yields in lungs (c), nasal washes (d) and guts (e), measured using a RT-qPCR assay. \*\* and \* symbols  
266 indicate that viral RNA yields for the 20I/501Y.V1 group are significantly lower than those of the  
267 BavPat D614G group with a p-value ranging between 0.001-0.01, and 0.01-0.05, respectively (Mann-  
268 Whitney and Unpaired t tests). (f-g) Comparative assessment of infectious titers in lungs (f) and nasal  
269 washes (g), measured using a TCID<sub>50</sub> assay. (h-i) Competition experiments. Two specific RT-qPCR  
270 assays were used to measure the quantity of each virus in lungs (h) and nasal washes (i). Results are  
271 expressed as [BavPat D614G/ 20I/501Y.V1] ratios. \*\*\* and \* symbols indicate that ratios at 4 dpi are  
272 higher than those at 2 dpi or in inocula with a p-value ranging between 0.0001-0.001 and 0.01-0.05,  
273 respectively (Mann-Whitney tests). (j-k) Seroneutralization tests performed with sera from animals  
274 sacrificed at 7 dpi. 90% (j) and 99% (k) Yield Reduction Neutralization Titers (90-99YRNT) were  
275 determined against three strains of SAR-CoV-2: BavPat D614G, 20I/501Y.V1 and 20H/501Y.V2.  
276 Results from statistical analysis are presented in Supplemental Table 1. (b-k) Data represent  
277 mean  $\pm$  SD.

278

279 **Figure 2**

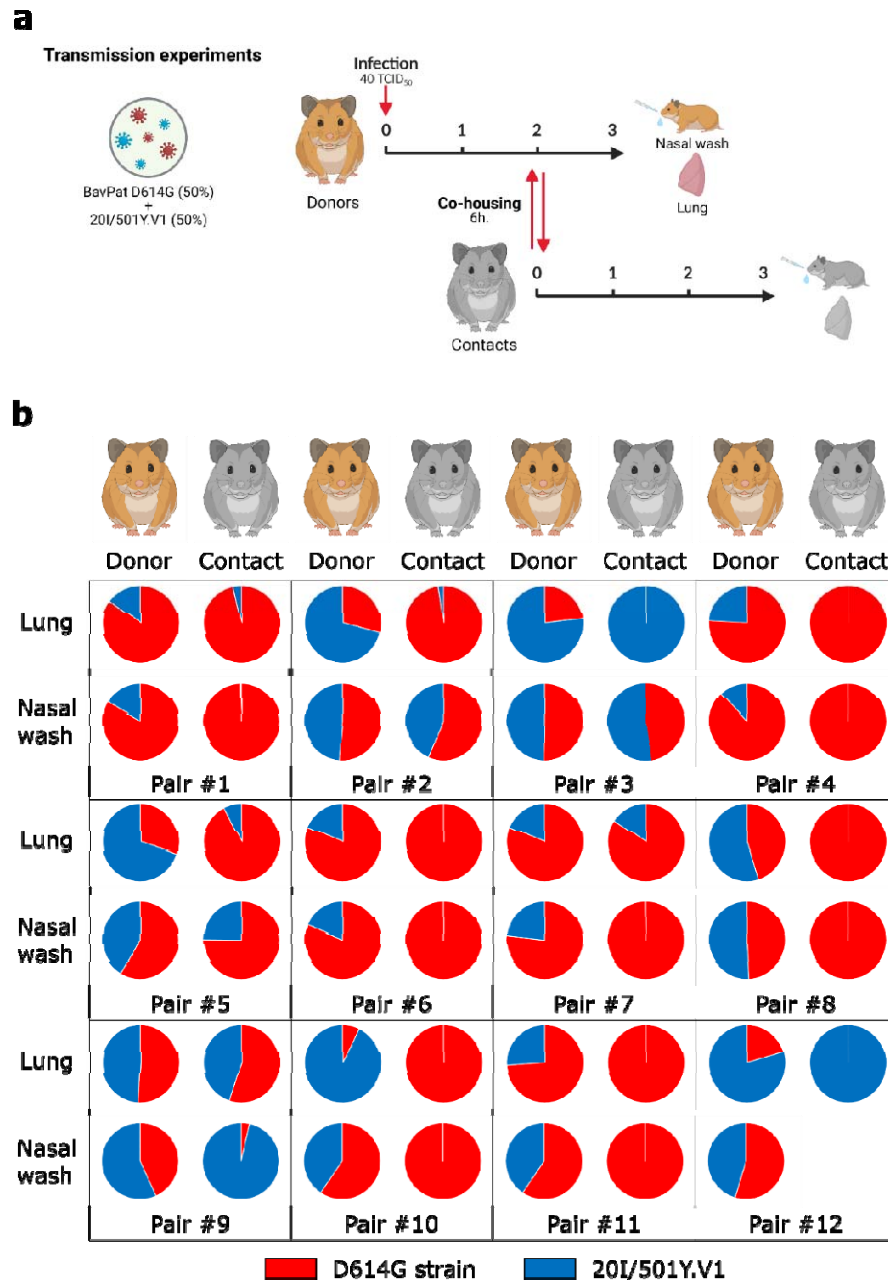

280

281 **Figure 2: Transmission experiments.** (a) Experimental timeline. A group of 12 hamsters, named  
 282 donors, was intranasally infected with a mix (1:1) of both viral strains for competition experiment (20  
 283 TCID<sub>50</sub> of each). At 2 dpi, each donor was co-housed with a contact animal during a period of 6 hours.  
 284 Donors and contacts were sacrificed at 3dpi and at 3 days post-contact respectively. (b) Graphical  
 285 representation of the proportion of each virus found in lungs and nasal washes for each pair of  
 286 animals. Two specific RT-qPCR assays were used to measure the quantity of each virus. The grey  
 287 circle means that no viral RNA was detected in this nasal wash.

**a****Comparative assessment**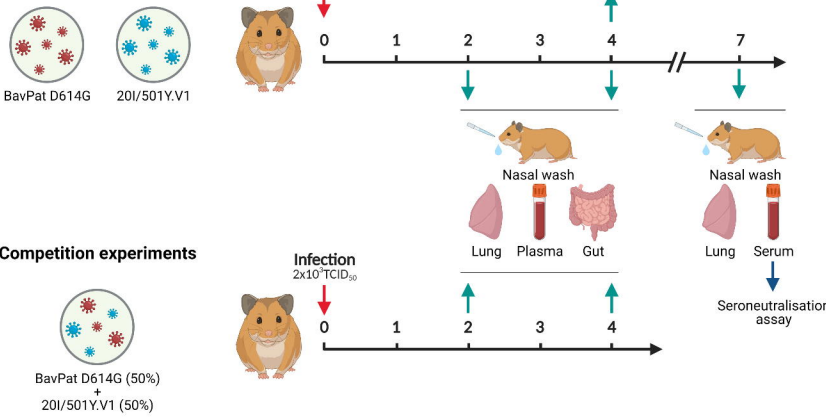**b**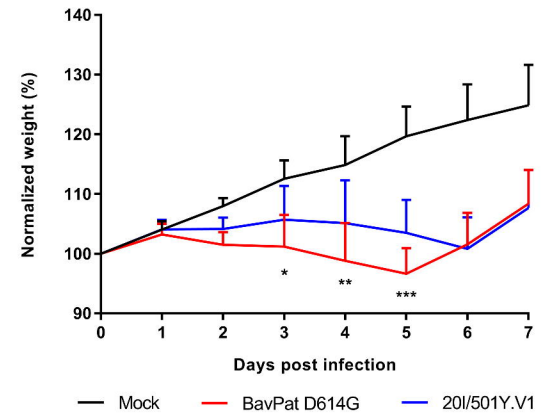**c**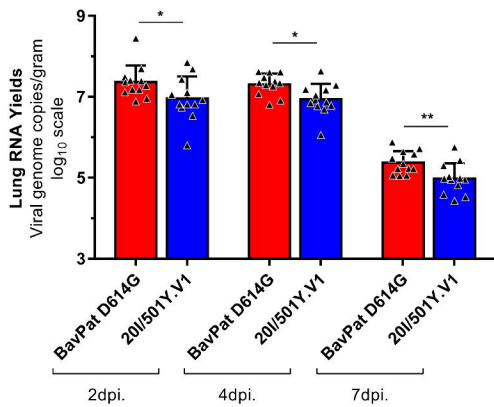**d**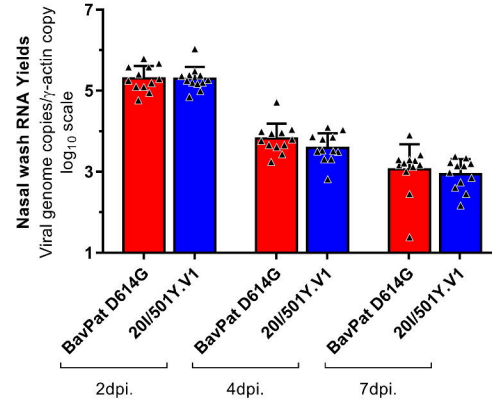**e**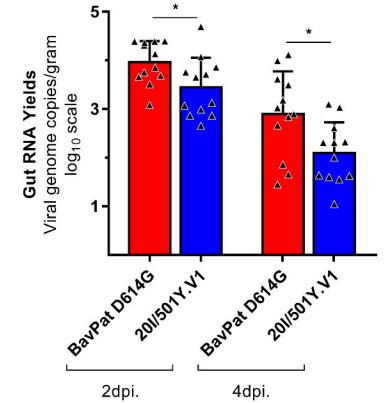**f**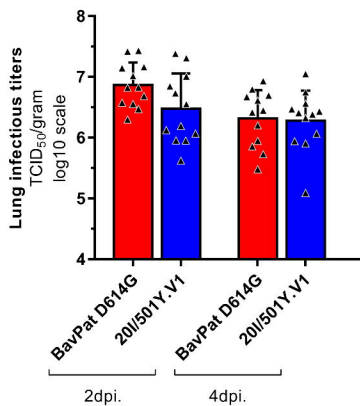**g**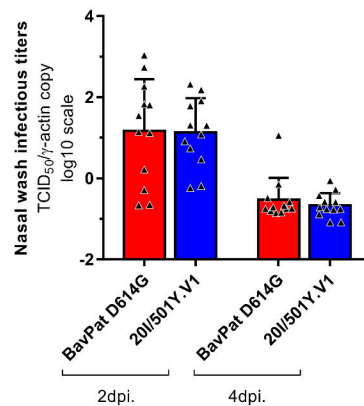**j**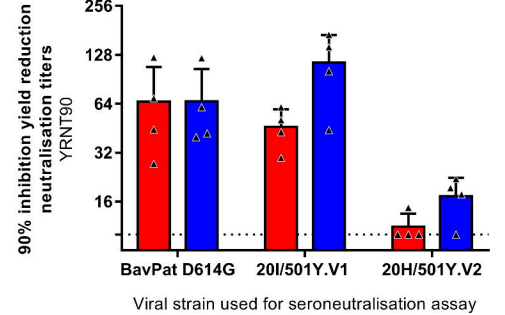**h**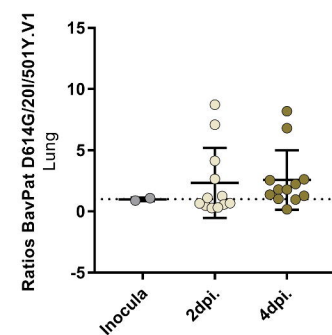**i**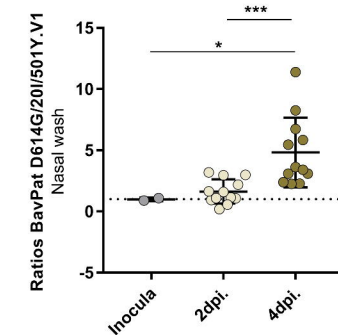**k**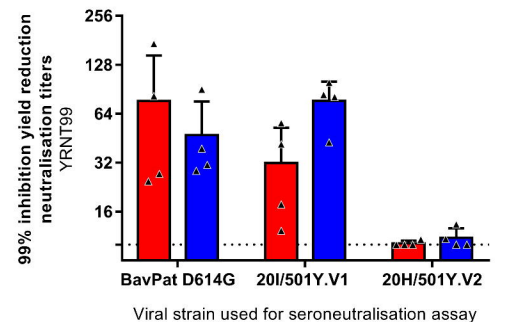

Viral strain used for infection : ■ BavPat D614G ■ 20I/501Y.V1



# Transmission experiments

BavPat D614G (50%)  
+  
20I/501Y.V1 (50%)

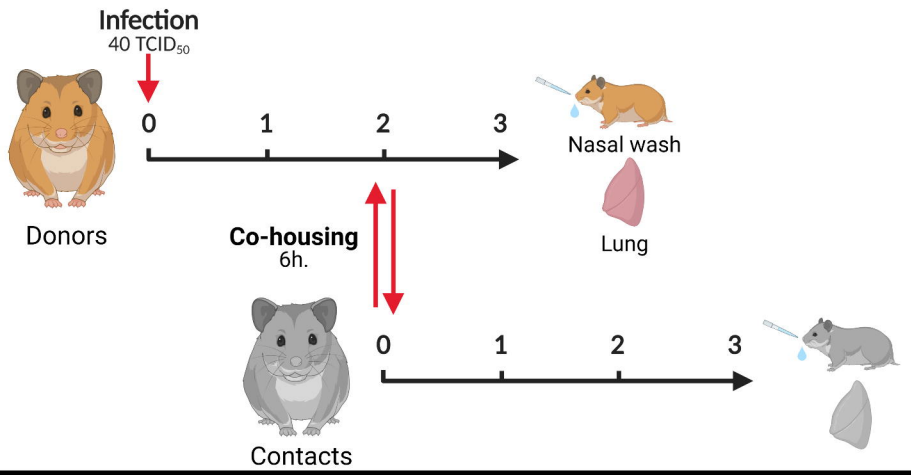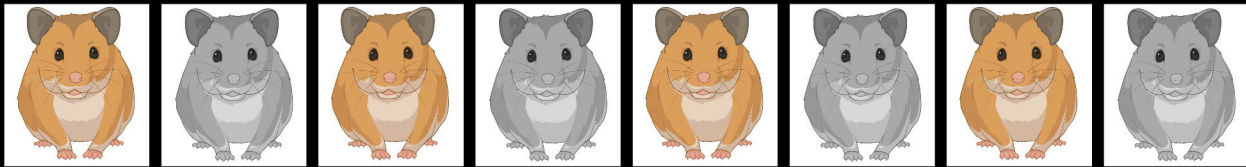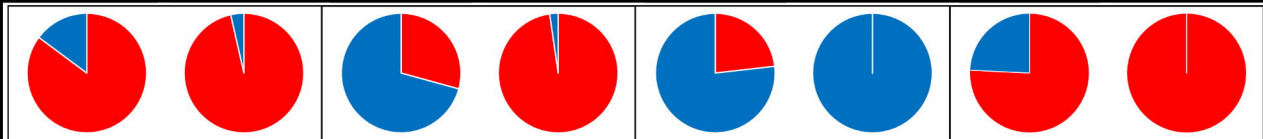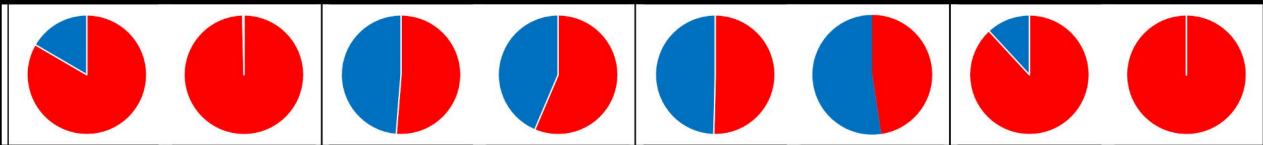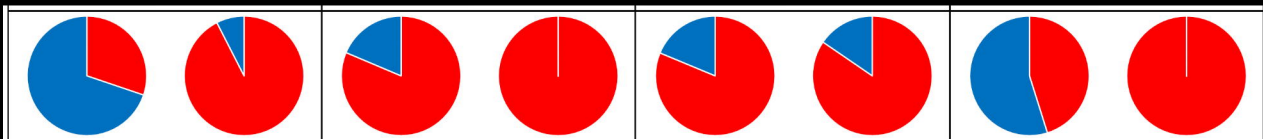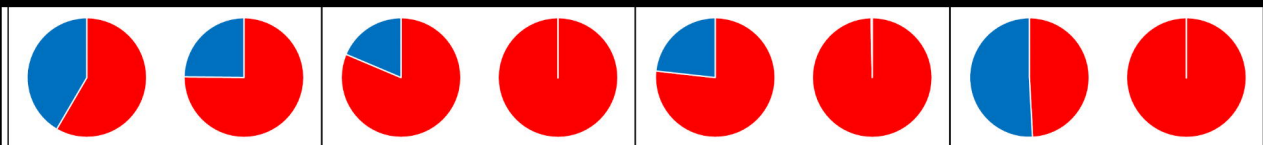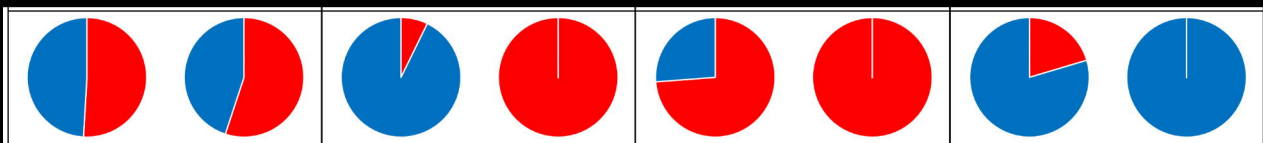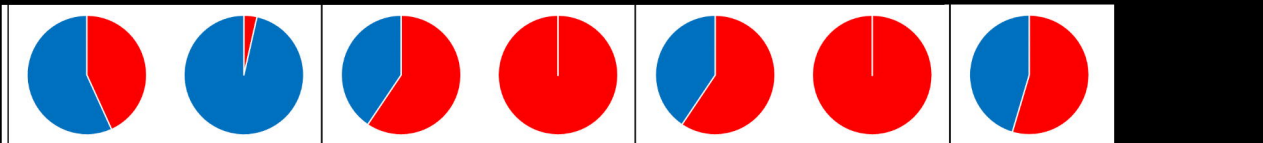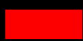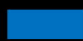

Source: https://www.biorxiv.org/content/10.1101/2021.04.19.440435v2.full.pdf
